# Supplementary material for: Intramolecular dehydration of mannitol in high-temperature liquid water without acid catalysts
Source: Royal Society of Chemistry journal article supplement (doi:10.1039/c4ra09198a), 2014-01-01
Supplement: c4ra09198a1.pdf [file c4ra09198a1.pdf]

Electronic Supplemental Information

**Intramolecular Dehydration of Mannitol in High-Temperature Liquid  
Water without Acid Catalysts**

Aritomo Yamaguchi<sup>1,2,\*</sup>, Osamu Sato<sup>1</sup>, Naoki Mimura<sup>1</sup> and Masayuki Shirai<sup>1,3,\*\*</sup>

<sup>1</sup> Research Center for Compact Chemical System, National Institute of Advanced  
Industrial Science and Technology (AIST)

4-2-1 Nigatake, Miyagino, Sendai 983-8551, Japan

<sup>2</sup> JST PRESTO

4-2-1 Nigatake, Miyagino, Sendai 983-8551, Japan

<sup>3</sup> Department of Chemistry and Bioengineering, Faculty of Engineering, Iwate  
University

Ueda 4-3-5, Morioka 020-8551, Japan

## Experimental section

D-sorbitol and D-mannitol were purchased from Wako Pure Chemical Industries, Ltd. and used without any further purification.

The dehydration of sugar alcohols was carried out in a batch reactor (inner volume: 6 cm<sup>3</sup>) made of a SUS316 1/2 OD tube.<sup>9d,10</sup> Sugar alcohol aqueous solution (3 cm<sup>3</sup>) was loaded in the reactor, and then it was purged with argon gas to remove air. The reactor was submerged into a molten-salt bath at a desired reaction temperature for a given reaction time and then submerged into a water bath for cooling to ambient temperature quickly after the reaction. A mixture of the reactant and liquid products was taken out from the reactor with distilled water and separated from solid products by filtration.

The quantitative analysis of the unreacted reactant and liquid products was conducted by a high-performance liquid chromatography (Shimadzu, HPLC) with a refractive index detector (Shimadzu, RID-10A) and a UV-Vis detector (Shimadzu, SPD-20AV) equipped with SUGAR SC1211 column (Shodex). The products were identified by comparing with the retention times of the standard materials: 1,4-anhydro-D-sorbitol (1,4-AHSO, Tronto Research Chemicals Inc.), 1,5-anhydro-D-sorbitol (1,5-AHSO, Carbosynth Ltd.), 2,5-anhydro-D-sorbitol (2,5-AHSO, Tronto Research

Chemicals Inc.), 1,4-3,6-dianhydro-D-sorbitol (isosorbide, Alfa Aesar), 1,4-anhydro-D-mannitol (1,4-AHMA, Carbosynth Ltd.), 1,5-anhydro-D-mannitol (1,5-AHMA, Carbosynth Ltd.), 2,5-anhydro-D-mannitol (2,5-AHMA, Carbosynth Ltd.), and 1,4-3,6-dianhydro-D-mannitol (isomannide, Tokyo Chemical Industries Co., Ltd.). The other possible trace product 3,6-anhydro-D-sorbitol (3,6-AHSO) and 2,6-anhydro-D-sorbitol (2,6-AHMA) could not be identified in this manuscript.

## Rate equations of mannitol dehydration with the kinetic parameters in Scheme 1

$$\frac{d[\text{Mannitol}]}{dt} = -k_{1M}[\text{Mannitol}] - k_{2M}[\text{Mannitol}] - k_{3M}[\text{Mannitol}] - k_{6M}[\text{Mannitol}] \quad (1)$$

$$\frac{d[1,4\text{-AHMA}]}{dt} = k_{1M}[\text{Mannitol}] - k_{4M}[1,4\text{-AHMA}] \quad (2)$$

$$\frac{d[2,5\text{-AHMA}]}{dt} = k_{2M}[\text{Mannitol}] \quad (3)$$

$$\frac{d[1,5\text{-AHMA}]}{dt} = k_{3M}[\text{Mannitol}] \quad (4)$$

$$\frac{d[\text{Isomannide}]}{dt} = k_{4M}[1,4\text{-AHMA}] - k_{5M}[\text{Isomannide}] \quad (5)$$

$$[\text{Mannitol}] = [\text{Mannitol}]_i \exp\{-k_{1M} - k_{2M} - k_{3M} - k_{6M}t\} \quad (6)$$

$$[1,4\text{-AHMA}] = \frac{k_{1M}}{k_{4M} - k_{1M} - k_{2M} - k_{3M} - k_{6M}} [\text{Mannitol}]_i [\exp\{-k_{1M} - k_{2M} - k_{3M} - k_{6M}t\} - \exp(-k_{4M}t)] \quad (7)$$

$$[2,5\text{-AHMA}] = \frac{k_{2M}}{k_{1M} + k_{2M} + k_{3M} + k_{6M}} [\text{Mannitol}]_i [1 - \exp\{-k_{1M} - k_{2M} - k_{3M} - k_{6M}t\}] \quad (8)$$

$$[1,5\text{-AHMA}] = \frac{k_{3M}}{k_{1M} + k_{2M} + k_{3M} + k_{6M}} [\text{Mannitol}]_i [1 - \exp\{-k_{1M} - k_{2M} - k_{3M} - k_{6M}t\}] \quad (9)$$

$$[\text{Isomannide}] = \frac{k_{1M}k_{4M}}{k_{4M} - k_{1M} - k_{2M} - k_{3M} - k_{6M}} [\text{Mannitol}]_i \left[ \frac{\exp\{-k_{1M} - k_{2M} - k_{3M} - k_{6M}t\} - \exp(-k_{5M}t)}{k_{5M} - k_{1M} - k_{2M} - k_{3M} - k_{6M}} - \frac{\exp(-k_{4M}t) - \exp(-k_{5M}t)}{k_{5M} - k_{4M}} \right] \quad (10)$$

## Rate equations of sorbitol dehydration with the kinetic parameters in Scheme 2

$$\frac{d[\text{Sorbitol}]}{dt} = -k_{1S}[\text{Sorbitol}] - k_{2S}[\text{Sorbitol}] - k_{3S}[\text{Sorbitol}] - k_{6S}[\text{Sorbitol}] \quad (11)$$

$$\frac{d[1,4\text{-AHSO}]}{dt} = k_{1S}[\text{Sorbitol}] - k_{4S}[1,4\text{-AHSO}] \quad (12)$$

$$\frac{d[2,5\text{-AHSO}]}{dt} = k_{2S}[\text{Sorbitol}] \quad (13)$$

$$\frac{d[1,5\text{-AHSO}]}{dt} = k_{3S}[\text{Sorbitol}] \quad (14)$$

$$\frac{d[\text{Isosorbide}]}{dt} = k_{4S}[1,4\text{-AHSO}] - k_{5S}[\text{Isosorbide}] \quad (15)$$

$$[\text{Sorbitol}] = [\text{Sorbitol}]_i \exp\{-k_{1S} - k_{2S} - k_{3S} - k_{6S}t\} \quad (16)$$

$$[1,4\text{-AHSO}] = \frac{k_{1S}}{k_{4S} - k_{1S} - k_{2S} - k_{3S} - k_{6S}} [\text{Sorbitol}]_i [\exp\{-k_{1S} - k_{2S} - k_{3S} - k_{6S}t\} - \exp(-k_{4S}t)] \quad (17)$$

$$[2,5\text{-AHSO}] = \frac{k_{2S}}{k_{1S} + k_{2S} + k_{3S} + k_{6S}} [\text{Sorbitol}]_i [1 - \exp\{-k_{1S} - k_{2S} - k_{3S} - k_{6S}t\}] \quad (18)$$

$$[1,5\text{-AHSO}] = \frac{k_{3S}}{k_{1S} + k_{2S} + k_{3S} + k_{6S}} [\text{Sorbitol}]_i [1 - \exp\{-k_{1S} - k_{2S} - k_{3S} - k_{6S}t\}] \quad (19)$$

$$[\text{Isosorbide}] = \frac{k_{1S}k_{4S}}{k_{4S} - k_{1S} - k_{2S} - k_{3S} - k_{6S}} [\text{Sorbitol}]_i \left[ \frac{\exp\{-k_{1S} - k_{2S} - k_{3S} - k_{6S}t\} - \exp(-k_{5S}t)}{k_{5S} - k_{1S} - k_{2S} - k_{3S} - k_{6S}} - \frac{\exp(-k_{4S}t) - \exp(-k_{5S}t)}{k_{5S} - k_{4S}} \right] \quad (20)$$

**Table S1** Kinetic parameters for dehydration reactions of mannitol and sorbitol

| Reaction temperature (K)                           | 523   | 548   | 560   | 573   |
|----------------------------------------------------|-------|-------|-------|-------|
| $\frac{k_{2M}}{k_{1M} + k_{2M} + k_{3M} + k_{6M}}$ | 0.44  | 0.42  | 0.41  | 0.37  |
| $\frac{k_{3M}}{k_{1M} + k_{2M} + k_{3M} + k_{6M}}$ | 0.068 | 0.054 | 0.050 | 0.040 |
| $\frac{k_{2S}}{k_{1S} + k_{2S} + k_{3S} + k_{6S}}$ | 0.091 | 0.14  | 0.15  | 0.19  |
| $\frac{k_{3S}}{k_{1S} + k_{2S} + k_{3S} + k_{6S}}$ | 0     | 0     | 0     | 0     |

**Table S2** Kinetic parameters for dehydration reactions of sorbitol (initial sorbitol concentration: 1.0 mol dm<sup>-3</sup>)

| <i>T</i> <sup>a</sup> (K)                     | 523                 | 548                | 560                | 573               | Activation energy (kJ mol <sup>-1</sup> ) |
|-----------------------------------------------|---------------------|--------------------|--------------------|-------------------|-------------------------------------------|
| <i>k</i> <sub>1S</sub> (mol h <sup>-1</sup> ) | 0.13 <sup>b</sup>   | 0.65 <sup>b</sup>  | 1.2 <sup>b</sup>   | 1.4 <sup>b</sup>  | 127 <sup>b</sup>                          |
| <i>k</i> <sub>2S</sub> (mol h <sup>-1</sup> ) | 0.013 <sup>b</sup>  | 0.11 <sup>b</sup>  | 0.22 <sup>b</sup>  | 0.32 <sup>b</sup> | 166 <sup>b</sup>                          |
| <i>k</i> <sub>4S</sub> (mol h <sup>-1</sup> ) | 0.016 <sup>b</sup>  | 0.18 <sup>b</sup>  | 0.36 <sup>b</sup>  | 0.78 <sup>b</sup> | 195 <sup>b</sup>                          |
| <i>k</i> <sub>5S</sub> (mol h <sup>-1</sup> ) | 0.0083 <sup>b</sup> | 0.041 <sup>b</sup> | 0.098 <sup>b</sup> | 0.11 <sup>b</sup> | 136 <sup>b</sup>                          |

<sup>a</sup> Reaction temperature, <sup>b</sup> The values were reported in Ref 10.

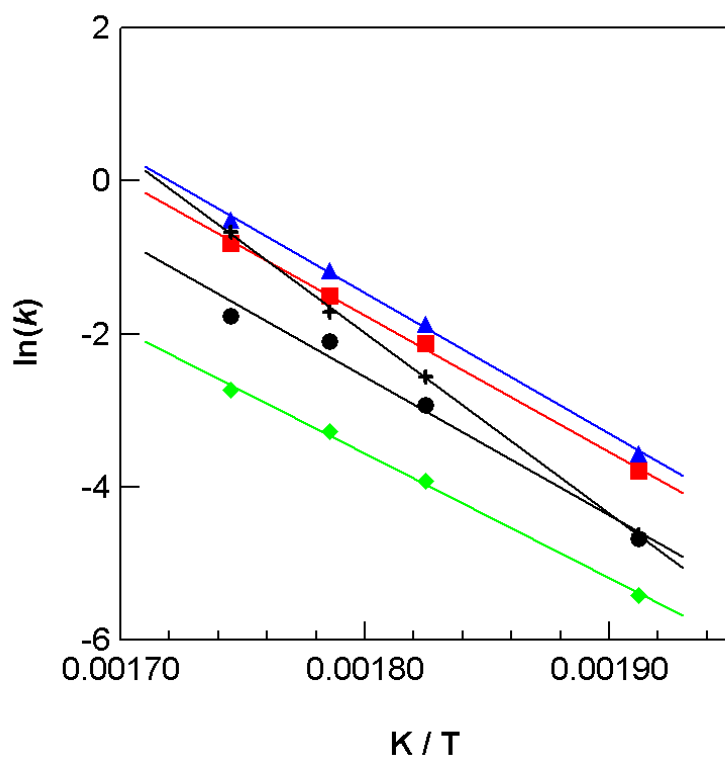

**Fig. S1** Arrhenius plots of the rate constants ( $k_{1M}$  (■),  $k_{2M}$  (▲),  $k_{3M}$  (◆),  $k_{4M}$  (●), and  $k_{6M}$  (+) in Scheme 1) for the mannitol dehydration in high-temperature liquid water.

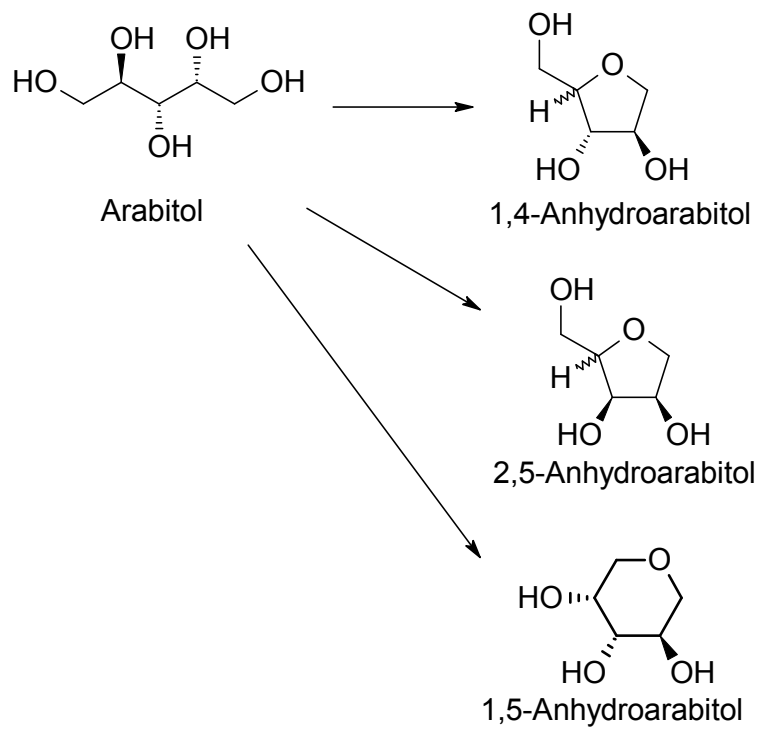

**Scheme S1** The reaction pathway of arabitol dehydration



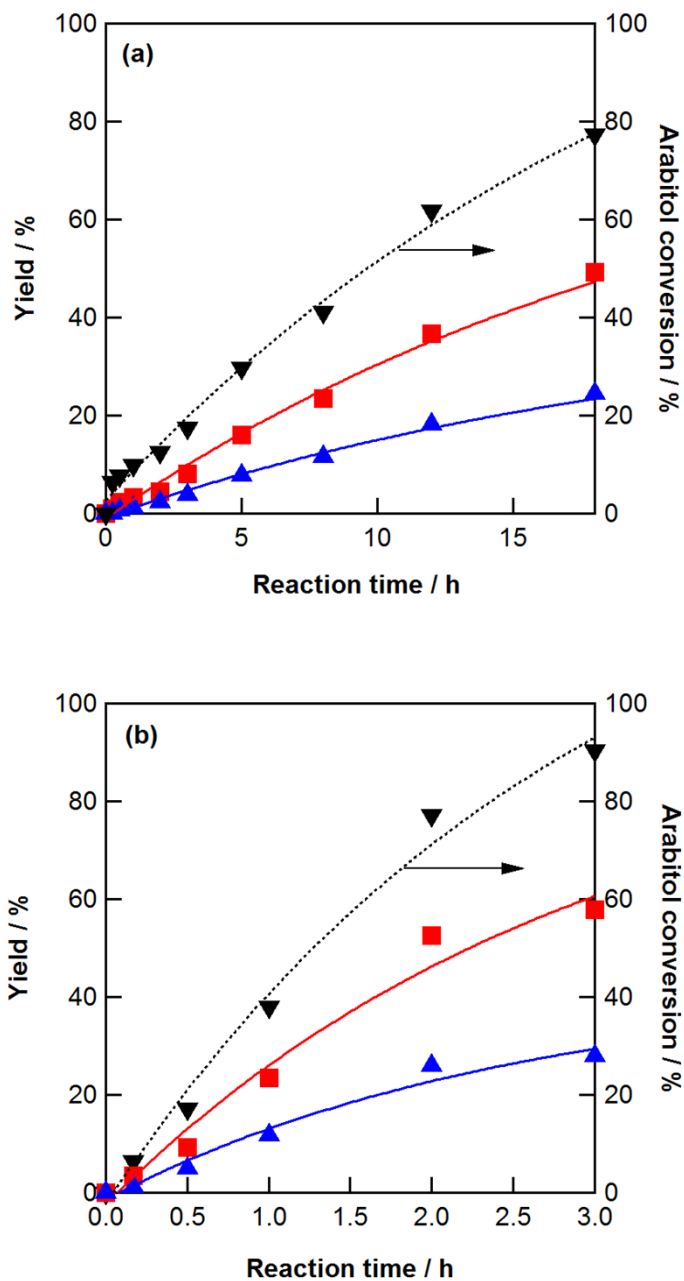

**Fig. S2** Yields of 1,4-anhydroarabitol (■), 2,5-anhydroarabitol (▲), and arabitinol conversion (▼), as a function of elapsed time for arabitinol dehydration reactions at (a) 548 and (b) 573 K in water (initial arabitinol concentration:  $0.5 \text{ mol dm}^{-3}$ )
